# Supplementary material for: Imaging assessment of tumor densities and sizes following pazopanib treatment for central nervous system solitary fibrous tumors with multiple extracranial metastases: A case series
Source: PubMed Central journal article supplement — Oncol Lett. 2024 Nov 6;29(1):45. doi: 10.3892/ol.2024.14791 (PMC11566106; doi:10.3892/ol.2024.14791), 2024-11-06
Supplement: Supplementary_Data2.pdf [file Supplementary_Data2.pdf]

Table SI. Imaging periods pre- and post-pazopanib initiation.

| Case no. | Imaging | Pre-initiation | Post-initiation, months | Post-interruption, months | Post-resumption, months |
|----------|---------|----------------|-------------------------|---------------------------|-------------------------|
| 1        | CT      | 2.5 months     | 2                       | 3                         | 7                       |
|          | MRI     | 3 days         | 1                       | NA                        | NA                      |
| 2        | CT      | 8 days         | 1.4                     | NA                        | NA                      |
|          | MRI     | 1 day          | 1                       | 2.2                       | NA                      |
| 3        | CT      | 0 day          | 2.8                     | NA                        | NA                      |
|          | MRI     | NA             | NA                      | NA                        | NA                      |

CT, computed tomography; MRI, magnetic resonance imaging; NA, not available.
